# Supplementary material
Source: PubMed Central journal article supplement (PMC6239974)

991 **Supplemental Figures and Tables:**

992 **Supplemental Figure 1:** IL-6 concentration in media from various control experiments

993 performed to confirm exosome specific activation of inflammatory mediators. Shown here is an  
994 example of myometrial (A), decidual (B) and BeWo cells (C).

995 On the x axis are all the treatments included:

996 Control: negative control

997 Lipopolysaccharide (LPS) was used as a positive control

998 Cold – cold treatment of cells to prevent endocytosis of exosomes

999 Heat inactivation – to disrupt exosomal membrane and denature proteomic cargo

1000 Sonication - to disrupt exosomal membrane and denature proteomic cargo

1001 Control and oxidative stress exosomes treatments at a dose of  $10^7$

1002 A – Myometrial cells treated with LPS and control and oxidative stress exosomes show increased  
1003 IL-6 compared to control. Cold, heat and sonication did not change IL-6 compared to negative  
1004 control

1005 B - Decidual cells treated with LPS and control and oxidative stress exosomes show increased  
1006 IL-6 compared to control. Cold treatment reduced IL-6 more than negative control settings  
1007 whereas heat and sonication did not change IL-6 compared to negative control.

1008 C – BeWo cells increase IL-6 in response to LPS. No change was seen with any other conditions  
1009 including exosome treatment.

1010

1011 **Supplemental Figure 2:** 3D reconstructions of confocal images of each target cell studied.  
 1012 Blue is DAPI which shows the nucleus. Red is a cytoplasmic protein either  $\alpha$  or  $\beta$  actin.  
 1013 Exosomes are shown in green. Exosomes are identified within each cell type (myometrial,  
 1014 decidual and BeWo) by yellow arrows.

1015

1016 **Supplemental Table 1A:** Cytokine and PGE<sub>2</sub> concentrations in myometrial cells treated with  
 1017 control exosomes.

| <b>IL-6</b>                             | Control         | Exo 10 <sup>5</sup> | Exo 10 <sup>7</sup> | Exo 10 <sup>9</sup> |
|-----------------------------------------|-----------------|---------------------|---------------------|---------------------|
| Mean $\pm$ SD                           | 62.5 $\pm$ 13.3 | 171.3 $\pm$ 43.1    | 190.6 $\pm$ 62.6    | 166.4 $\pm$ 58.0    |
| Median (IQR)                            | 60.3 (21.5)     | 190.4 (47.8)        | 190.4 (107.9)       | 147.7 (78.6)        |
| p - Untreated cells vs control exosomes |                 | 0.03                | 0.03                | 0.03                |

1018

| <b>IL-8</b>                             | Control             | Exo 10 <sup>5</sup>   | Exo 10 <sup>7</sup>   | Exo 10 <sup>9</sup>    |
|-----------------------------------------|---------------------|-----------------------|-----------------------|------------------------|
| Mean $\pm$ SD                           | 19721 $\pm$ 18210.7 | 99892.8 $\pm$ 21968.2 | 90793.1 $\pm$ 23044.6 | 114652.2 $\pm$ 24259.5 |
| Median (IQR)                            | 11764.0 (200059)    | 103786.9 (31454)      | 88936.9 (37985.0)     | 24259.5 (119391.2)     |
| p - Untreated cells vs control exosomes |                     | 0.03                  | 0.03                  | 0.03                   |

1019

| <b>PGE<sub>2</sub></b>                  | Control           | Exo 10 <sup>5</sup> | Exo 10 <sup>7</sup> | Exo 10 <sup>9</sup> |
|-----------------------------------------|-------------------|---------------------|---------------------|---------------------|
| Mean $\pm$ SD                           | 1120.1 $\pm$ 60.5 | 1301.5 $\pm$ 62.9   | 1179.8 $\pm$ 60.5   | 1064.1 $\pm$ 47.2   |
| Median (IQR)                            | 1097.8 (83.5)     | 1300.6 (97.4)       | 1184.6 (99.2)       | 1073.4 (69.3)       |
| p - Untreated cells vs control exosomes |                   | 0.03                | 0.19                | 0.31                |

1020

1021

1022

1023

1024

1025

1026

1027 **Supplemental Table 1B:** Cytokine and PGE<sub>2</sub> concentrations in myometrial cells treated with  
 1028 exosomes derived from AEC exposed to cigarette smoke extract (Oxidative stress (OS)  
 1029 exosomes).

| <b>IL-6</b>                        | Control     | OS Exo 10 <sup>5</sup> | OS Exo 10 <sup>7</sup> | OS Exo 10 <sup>9</sup> |
|------------------------------------|-------------|------------------------|------------------------|------------------------|
| Mean ± SD                          | 62.5±13.3   | 165.2±48.4             | 192.7±37.67            | 178.6±12.31            |
| Median (IQR)                       | 60.3 (21.5) | 149.9 (58.2)           | 186.3 (56.0)           | 178.7 (21.0)           |
| p - Untreated cells vs OS exosomes |             | 0.03                   | 0.03                   | 0.03                   |

1030

| <b>IL-8</b>                        | Control            | OS Exo 10 <sup>5</sup> | OS Exo 10 <sup>7</sup> | OS Exo 10 <sup>9</sup> |
|------------------------------------|--------------------|------------------------|------------------------|------------------------|
| Mean ± SD                          | 19721.4±18210.7    | 99177.3±27778.8        | 130680.0±26657.2       | 131687±35418           |
| Median (IQR)                       | 11764.0 (200059.0) | 107778.5 (37597.0)     | 119572.0(29365.0)      | 137049.3(51333.0)      |
| p - Untreated cells vs OS exosomes |                    | 0.03                   | 0.03                   | 0.03                   |

1031

| <b>PGE<sub>2</sub></b>             | Control       | OS Exo 10 <sup>5</sup> | OS Exo 10 <sup>7</sup> | OS Exo 10 <sup>9</sup> |
|------------------------------------|---------------|------------------------|------------------------|------------------------|
| Mean ± SD                          | 1120±60.5     | 1650.0±174.4           | 1304.9±174.4           | 1360.0±101.5           |
| Median (IQR)                       | 1097.8 (83.5) | 1705.6 (240.0)         | 1337.4(154.8)          | 1373.2 (153.3)         |
| p - Untreated cells vs OS exosomes |               | 0.03                   | 0.06                   | 0.03                   |

1032

1033

1034

1035

1036

1037

1038

1039

1040

1041

1042

1043

1044

1045 **Supplemental Table 2A:** Cytokine and PGE<sub>2</sub> concentrations in decidual cells treated with  
 1046 control exosomes.

| <b>IL-6</b>                             | Control     | Exo 10 <sup>5</sup> | Exo 10 <sup>7</sup> | Exo 10 <sup>9</sup> |
|-----------------------------------------|-------------|---------------------|---------------------|---------------------|
| Mean ± SD                               | 22.8±14.1   | 101.8±12.1          | 113.6±31.8          | 75.1±3.290          |
| Median (IQR)                            | 18.4 (16.2) | 104.8 (18.6)        | 119.3(45.6)         | 75.8 (4.6)          |
| p - Untreated cells vs control exosomes |             | 0.03                | 0.03                | 0.03                |

1047

| <b>IL-8</b>                             | Control       | Exo 10 <sup>5</sup> | Exo 10 <sup>7</sup> | Exo 10 <sup>9</sup> |
|-----------------------------------------|---------------|---------------------|---------------------|---------------------|
| Mean ± SD                               | 148.1±109.1   | 687.4±312.3         | 747.6±464.9         | 1546±217.8          |
| Median (IQR)                            | 150.4 (186.5) | 800.5 (363.3)       | 818.1 (715.2)       | 1589.2 (274.2)      |
| p - Untreated cells vs control exosomes |               | 0.11                | 0.11                | 0.03                |

1048

| <b>PGE<sub>2</sub></b>                  | Control    | Exo 10 <sup>5</sup> | Exo 10 <sup>7</sup> | Exo 10 <sup>9</sup> |
|-----------------------------------------|------------|---------------------|---------------------|---------------------|
| Mean ± SD                               | 18.0±1.5   | 23.5±2.2            | 19.2±3.1            | 24.8±4.4            |
| Median (IQR)                            | 18.3 (2.4) | 23.3 (3.5)          | 18.7 (4.7)          | 22.7 (4.5)          |
| p - Untreated cells vs control exosomes |            | 0.03                | 0.66                | 0.03                |

1049

1050 **Supplemental Table 2B:** Cytokine and PGE<sub>2</sub> concentrations in decidual cells treated with  
 1051 exosomes derived from AEC exposed to cigarette smoke extract (Oxidative stress (OS)  
 1052 exosomes).

| <b>IL-6</b>                        | Control     | OS Exo 10 <sup>5</sup> | OS Exo 10 <sup>7</sup> | OS Exo 10 <sup>9</sup> |
|------------------------------------|-------------|------------------------|------------------------|------------------------|
| Mean ± SD                          | 22.8±14.1   | 94.2±17.4              | 100.7±27.5             | 150.8±12.4             |
| Median (IQR)                       | 18.4 (16.2) | 92.8 (27.2)            | 104.9 (39.7)           | 148.6 (18.3)           |
| p - Untreated cells vs OS exosomes |             | 0.03                   | 0.03                   | 0.03                   |

1053

1054

1055

1056

| <b>IL-8</b>                        | Control       | OS Exo 10 <sup>5</sup> | OS Exo 10 <sup>7</sup> | OS Exo 10 <sup>9</sup> |
|------------------------------------|---------------|------------------------|------------------------|------------------------|
| Mean ± SD                          | 148.1±109.1   | 672.8±351.7            | 673.1±334.7            | 946.9±478.3            |
| Median (IQR)                       | 150.4 (186.5) | 676.9(505.8)           | 772.6 (482.6)          | 936.1 (703.4)          |
| p - Untreated cells vs OS exosomes |               | 0.06                   | 0.11                   | 0.03                   |

1057

| <b>PGE<sub>2</sub></b>             | Control    | OS Exo 10 <sup>5</sup> | OS Exo 10 <sup>7</sup> | OS Exo 10 <sup>9</sup> |
|------------------------------------|------------|------------------------|------------------------|------------------------|
| Mean ± SD                          | 18.0±1.5   | 30.4±4.2               | 32.1±6.1               | 34.24±3.1              |
| Median (IQR)                       | 18.3 (2.4) | 29.2(6.4)              | 32.9 (8.5)             | 33.4 (3.9)             |
| p - Untreated cells vs OS exosomes |            | 0.03                   | 0.03                   | 0.03                   |

1058

1059

1060 **Supplemental Table 3A:** Cytokine and PGE<sub>2</sub> concentrations in BeWo cells treated with control  
 1061 exosomes.

| <b>IL-6</b>                             | Control    | Exo 10 <sup>5</sup> | Exo 10 <sup>7</sup> | Exo 10 <sup>9</sup> |
|-----------------------------------------|------------|---------------------|---------------------|---------------------|
| Mean ±SD                                | 57.0±6.0   | 52.6±9.4            | 48.6±7.2            | 47.4±11.6           |
| Median (IQR)                            | 55.4 (8.3) | 50.6 (11.5)         | 46.5 (10.3)         | 47.1 (14.8)         |
| p - Untreated cells vs control exosomes |            | 0.31                | 0.19                | 0.19                |

1062

| <b>PGE<sub>2</sub></b>                  | Control     | Exo 10 <sup>5</sup> | Exo 10 <sup>7</sup> | Exo 10 <sup>9</sup> |
|-----------------------------------------|-------------|---------------------|---------------------|---------------------|
| Mean ±SD                                | 0.09± 0.01  | 0.12± 0.02          | 0.12± .01           | 0.09 ± 0.01         |
| Median (IQR)                            | 0.10 (0.01) | 0.12 (0.03)         | 0.12 (0.01)         | 0.09 (0.02)         |
| p - Untreated cells vs control exosomes |             | 0.03                | 0.03                | 0.89                |

1063

1064

1065

1066

1067

1068

1069

1070 **Supplemental Table 3B:** Cytokine and PGE<sub>2</sub> concentrations in BeWo cells treated with  
 1071 exosomes derived from AEC exposed to cigarette smoke extract (Oxidative stress (OS)  
 1072 exosomes).

| <b>IL-6</b>                        | Control    | OS Exo 10 <sup>5</sup> | OS Exo 10 <sup>7</sup> | OS Exo 10 <sup>9</sup> |
|------------------------------------|------------|------------------------|------------------------|------------------------|
| Mean ±SD                           | 57.0±6.0   | 47.1±9.1               | 50.5±10.1              | 54.7±16.1              |
| Median (IQR)                       | 55.4 (8.3) | 46.0 (14.9)            | 54.3 (13.1)            | 50.2 (22.7)            |
| p - Untreated cells vs OS exosomes |            | 0.19                   | 0.67                   | 0.67                   |

1073

| <b>PGE<sub>2</sub></b>             | Control     | OS Exo 10 <sup>5</sup> | OS Exo 10 <sup>7</sup> | OS Exo 10 <sup>9</sup> |
|------------------------------------|-------------|------------------------|------------------------|------------------------|
| Mean ±SD                           | 0.09±0.01   | 0.10±0.01              | 0.10±0.01              | 0.10±0.02              |
| Median (IQR)                       | 0.10 (0.01) | 0.10 (0.02)            | 0.10 (0.02)            | 0.10 (0.02)            |
| p - Untreated cells vs OS exosomes |             | 0.56                   | 0.67                   | 0.19                   |

1074

1075

1076 **Supplemental Table 4** – Control experiments used to show exosome mediated immune  
 1077 activation effects in myometrial, decidual and BeWo cells.

|                   | LPS  |      |                  | Cold treatment of cells |      |                  | Heat inactivation of exosomes |      |                  | Sonication of exosomes |      |                  |
|-------------------|------|------|------------------|-------------------------|------|------------------|-------------------------------|------|------------------|------------------------|------|------------------|
|                   | IL-6 | IL-8 | PGE <sub>2</sub> | IL-6                    | IL-8 | PGE <sub>2</sub> | IL-6                          | IL-8 | PGE <sub>2</sub> | IL-6                   | IL-8 | PGE <sub>2</sub> |
| <b>Myometrium</b> | ↑    | ↑    | ↑                | ↓                       | ↓    | ↔                | ↔                             | ↔    | ↔                | ↓                      | ↔    | ↔                |
| <b>Decidua</b>    | ↑    | ↑    | ↑                | ↓                       | ↓    | ↓                | ↔                             | ↔    | ↔                | ↔                      | ↔    | ↔                |
| <b>BeWo</b>       | ↑    | ↔    | X                | ↓                       | ↔    | ↓                | ↔                             | ↔    | ↔                | ↔                      | ↔    | ↔                |

1078

1079

1080 ↑ **Increase**  
 1081 ↓ **Decrease**  
 1082 ↔ **No change**  
 1083 **X not detectable**

1082

1083

1084

1085

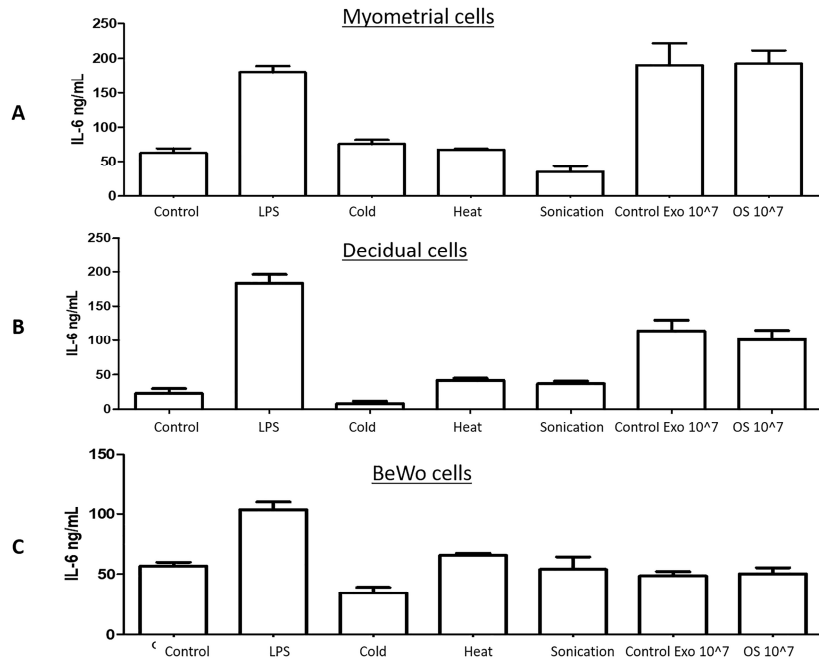



Myometrial

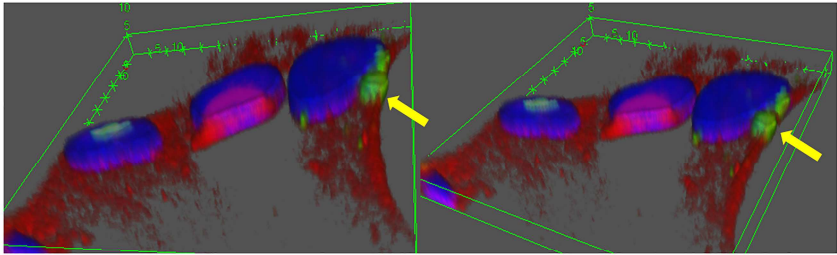

Decidual

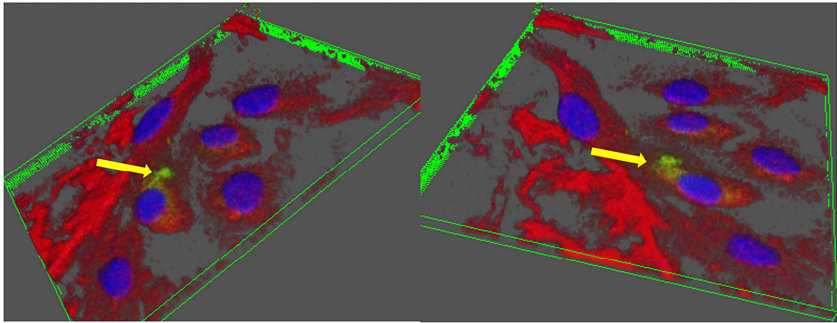

BeWo

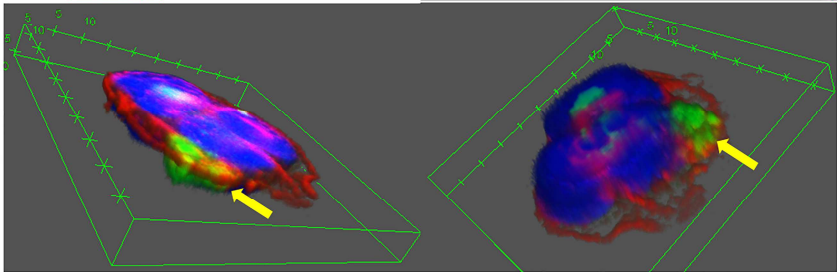

Supplement: NIHMS1508917-supplement-1.pdf [file NIHMS1508917-supplement-1.pdf]
